# Supplementary material
Source: Research Square preprint supplement (doi:10.21203/rs.3.rs-6788790/v1)
Supplement: Supplementary file 1 [file 0ba5b66d7c80b5aad9849bd0.docx]

**Questionnaire Structure and Items**

| **Construct** | **Items** |
| --- | --- |
| **Basic Information** | Gender: |
| Age: |
| Profession: |
| Language Proficiency: |
| Frequency of Attending International Conferences: |
| **Multi-language Support** | I believe the conference offers a wide range of language options. |
| The language support provided by the conference meets my needs. |
| The available language options cover major global languages. |
| The translation services of the conference support all necessary language pairs. |
| The diversity of language support enhances the inclusivity of the conference. |
| **Fluency** | The translation process was smooth, without interruptions or delays. |
| I was able to easily understand the translated content. |
| The speaking speed of the translation matched that of the speaker. |
| The translation was expressed naturally, without feeling stiff or mechanical. |
| Smooth translation enhanced my conference experience. |
| **Accuracy** | The translated content was identical to the speaker's original words. |
| I am satisfied with the accuracy of the translation. |
| In terms of key terminology and concepts, the translation did not contain errors. |
| The translation did not omit any important information. |
| Accuracy is one of the most important factors in assessing translation quality. |
| **Satisfaction** | I am very satisfied with the translation services provided by the conference. |
| I believe the translation services improved the overall quality of the conference. |
| I am willing to continue using the same translation services in future conferences. |
| The translation services met or exceeded my expectations. |
| I would recommend this translation service to others. |
| **Emotional Resonance** | The translation services made me feel connected culturally. |
| I am satisfied with the professional attitude of the translators. |
| The translation services enhanced my emotional investment in the conference theme. |
| I believe the translators understood the emotional expressions of the speakers. |
| The human translation services facilitated emotional exchanges among attendees. |
| **Innovation** | I believe the conference was innovative in terms of translation services. |
| The translation services showcased the latest AI translation technology. |
| The conference promoted industry innovation through translation services. |
| I am impressed by the innovation in translation services at the conference. |
| **Conference Atmosphere** | I believe the translation services promoted friendly exchanges among attendees. |
| The conference was more open and inclusive due to the translation services. |
| The translation services enhanced the vitality and attractiveness of the conference. |
| I am satisfied with the overall atmosphere of the conference, with translation services playing a positive role. |
| **Conference**  **Effectiveness** | The translation services helped attendees better understand the conference content. |
| I believe the translation services improved the efficiency of the conference. |
| The translation services ensured accurate information transfer. |
| The effectiveness of the conference was enhanced by the translation services. |
| **Real-time** | I did not experience any significant delays in receiving translations. |
| The quick response time of the translation services was important to me. |
| The timeliness of the translation services enhanced my overall satisfaction with the conference. |
| **Flow Experience** | The translation services allowed me to fully immerse myself in the conference content. |
| The translation process did not disrupt my engagement with the conference sessions. |
| I was able to maintain a high level of concentration and focus thanks to the translation services. |
